# Supplementary material
Source: PubMed Central journal article supplement (PMC7055499)
Supplement: NIHMS1558170-supplement-Online_Resource_2_Table_S1.pdf [file NIHMS1558170-supplement-Online_Resource_2_Table_S1.pdf]

## Online Resource 2

**Table S1** Processing parameters used for the analysis

| Processing parameters              | Attribute                      | Value          |
|------------------------------------|--------------------------------|----------------|
| <b>Mass Accuracy</b>               |                                |                |
| Electrospray Survey                | Perform Lock Mass Calibration  | Yes            |
|                                    | Lock Spray Lock Mass           | 785.8427 Da/e  |
|                                    | Lock Spray Scans               | 10             |
|                                    | Lock Mass Tolerance            | 0.1 Da         |
| MSMS                               | Perform Lock Mass Calibration  | Yes            |
|                                    | Lock Spray Lock Mass           | 785.8427 Da/e  |
|                                    | Lock Spray Scans               | 10             |
|                                    | Lock Mass Tolerance            | 0.1 Da         |
| <b>Noise Reduction</b>             |                                |                |
| Electrospray Survey                | Background Subtract Type       | Normal         |
|                                    | Background Threshold           | 35.00%         |
|                                    | Background Polynomial          | 5              |
|                                    | Perform Smoothing              | Yes            |
|                                    | Smoothing Type                 | Savitzky-Golay |
|                                    | Smoothing Iterations           | 2              |
|                                    | Smoothing Window               | 3 channels     |
| MSMS                               | Background Subtract Type       | Normal         |
|                                    | Background Threshold           | 35.00%         |
|                                    | Background Polynomial          | 5              |
|                                    | Perform Smoothing              | Yes            |
|                                    | Smoothing Type                 | Savitzky-Golay |
|                                    | Smoothing Iterations           | 2              |
|                                    | Smoothing Window               | 3 channels     |
| <b>Deisotoping and Centroiding</b> |                                |                |
| Electrospray Survey                | Perform Deisotoping            | Yes            |
|                                    | Deisotoping Type               | Fast           |
|                                    | Iterations (default)           | 30             |
|                                    | Automatic Thresholds (default) | No             |
|                                    | Threshold (default)            | 3%             |
|                                    | Minimum Peak Width             | 4 Channels     |
|                                    | Centroid Top                   | 80%            |
|                                    | TOF Resolution                 | 10000          |
| MSMS                               | Perform Deisotoping            | Yes            |
|                                    | Deisotoping Type               | Fast           |
|                                    | Iterations (default)           | 30             |
|                                    | Automatic Thresholds (default) | No             |
|                                    | Threshold (default)            | 3%             |
|                                    | Minimum Peak Width             | 4 Channels     |
|                                    | Centroid Top                   | 80%            |
|                                    | TOF Resolution                 | 10000          |
|                                    | NP Multiplier                  | 70%            |

**Intracellular proteomic analysis of *Streptomyces* sp. MC1 when exposed to Cr(VI) by gel-based and gel-free methods.** Current Microbiology. José O. Bonilla, Eduardo A. Callegari, María C. Estevez, Liliana B. Villegas.

**Corresponding author:** Liliana B. Villegas. Instituto de Química San Luis (INQUISAL), CONICET. Chacabuco 917, 5700, San Luis, Argentina. T: +54 266 4520300 (6108). e-mail: lbvilleg@hotmail.com, lbvillegas@unsl.edu.ar
