# Supplementary material
Source: PubMed Central journal article supplement (PMC7055499)
Supplement: NIHMS1558170-supplement-Online_Resource_4.pdf [file NIHMS1558170-supplement-Online_Resource_4.pdf]

**Online Resource 4** Proteins expressed in the presence and absence of Cr(VI) which are found overexpressed in the presence of Cr(VI).

| Bar number <sup>a</sup>          | Accession <sup>b</sup> | Protein identification <sup>b</sup>                    | Protein Length (AA) <sup>c</sup> | Mass (kDa) <sup>d</sup> |
|----------------------------------|------------------------|--------------------------------------------------------|----------------------------------|-------------------------|
| <b>Energy production</b>         |                        |                                                        |                                  |                         |
| 1                                | AIJ13322.1             | ATP synthase subunit delta                             | 274                              | 29.147                  |
| 6                                | BAC70594.1             | putative F-type proton-transporting ATPase alpha chain | 529                              | 57.211                  |
| 39                               | AIJ13319.1             | ATP synthase subunit beta                              | 478                              | 52.127                  |
| <b>Biosynthesis</b>              |                        |                                                        |                                  |                         |
| 2                                | AIJ13934.1             | 30S ribosomal protein S5                               | 201                              | 20.469                  |
| 3                                | AIJ13995.1             | 50S ribosomal protein L7/L12                           | 127                              | 13.183                  |
| 4                                | AIJ13920.1             | 30S ribosomal protein S9                               | 170                              | 18.669                  |
| 5                                | AIJ16455.1             | 30S ribosomal protein S1                               | 502                              | 54.983                  |
| 9                                | AIJ13952.1             | 30S ribosomal protein S10                              | 102                              | 11.496                  |
| 13                               | AIJ13020.1             | Translation initiation factor IF-2                     | 613                              | 66.056                  |
| 14                               | AIJ13086.1             | 30S ribosomal protein S2                               | 315                              | 34.023                  |
| 23                               | AIJ13335.1             | Transcription termination factor Rho                   | 707                              | 76.484                  |
| 26                               | BAC73900.1             | putative glutamate synthase(NADPH) large subunit       | 1516                             | 162.882                 |
| 28                               | AIJ13083.1             | Ribosome-recycling factor                              | 185                              | 20.756                  |
| 33                               | AIJ16941.1             | 30S ribosomal protein S4                               | 204                              | 23.579                  |
| 34                               | BAC71850.1             | putative phosphoribosyl formylglycinamide synthase II  | 752                              | 79.836                  |
| 35                               | AIJ13926.1             | DNA-directed RNA polymerase subunit alpha              | 340                              | 36.655                  |
| 38                               | AIJ13986.1             | Elongation factor Tu-1                                 | 397                              | 43.735                  |
| 40                               | AIJ13993.1             | DNA-directed RNA polymerase subunit beta'              | 1299                             | 144.496                 |
| 41                               | AIJ13987.1             | Elongation factor G 1                                  | 708                              | 77.590                  |
| 42                               | AIJ13988.1             | 30S ribosomal protein S7                               | 156                              | 17.402                  |
| <b>Oxide-reduction processes</b> |                        |                                                        |                                  |                         |
| 11                               | AIJ13180.1             | D-3-phosphoglycerate dehydrogenase                     | 529                              | 54.995                  |
| 16                               | AIJ13174.1             | 3-isopropylmalate dehydrogenase                        | 347                              | 36.664                  |
| 21                               | AIJ16273.1             | dihydrolipoyl dehydrogenase                            | 462                              | 48.889                  |
| 27                               | CBG68387.1             | NADP(+)-dependent isocitrate dehydrogenase             | 739                              | 79.132                  |

|                   |            |                                                      |      |         |
|-------------------|------------|------------------------------------------------------|------|---------|
| <b>29</b>         | AIJ16638.1 | enoyl-ACP reductase                                  | 255  | 27.118  |
| <b>32</b>         | BAC73735.2 | putative dihydrolipoamide dehydrogenase              | 462  | 48.730  |
| <b>36</b>         | AIJ16505.1 | Glyceraldehyde-3-phosphate dehydrogenase             | 336  | 36.228  |
| <b>Chaperones</b> |            |                                                      |      |         |
| <b>10</b>         | AIJ13893.1 | 60 kDa chaperonin 1                                  | 541  | 57.066  |
| <b>15</b>         | AIJ15832.1 | Trigger factor                                       | 468  | 51.119  |
| <b>30</b>         | AIJ14357.1 | 60 kDa chaperonin 2                                  | 541  | 56.777  |
| <b>Others</b>     |            |                                                      |      |         |
| <b>7</b>          | AIJ13849.1 | Succinyl-CoA ligase [ADP-forming] subunit beta-1     | 394  | 41.559  |
| <b>8</b>          | AIJ12642.1 | Aconitate hydratase 1                                | 904  | 90.302  |
| <b>12</b>         | AIJ13384.1 | Multifunctional 2-oxoglutarate metabolism enzyme     | 1272 | 139.103 |
| <b>17</b>         | AIJ15373.1 | Enolase 1                                            | 426  | 45.437  |
| <b>18</b>         | CBG70655.1 | serine hydroxymethyltransferase                      | 482  | 51.679  |
| <b>19</b>         | CBG70904.1 | cold shock protein                                   | 67   | 7.151   |
| <b>20</b>         | AIJ12990.1 | Polyribonucleotide nucleotidyltransferase            | 739  | 79.292  |
| <b>22</b>         | AIJ15811.1 | Aminopeptidase N                                     | 857  | 94.347  |
| <b>24</b>         | BAC72765.1 | putative S-adenosyl-L-homocysteine hydrolase         | 485  | 52.958  |
| <b>25</b>         | AIJ16063.1 | hypothetical protein SLIV_25755                      | 82   | 8.893   |
| <b>31</b>         | AIJ16155.1 | hypothetical protein SLIV_26220                      | 196  | 21.582  |
| <b>37</b>         | AIJ12373.1 | Acetyl-/propionyl-coenzyme A carboxylase alpha chain | 590  | 62.456  |

<sup>a</sup> The identification of bar is based on at least one peptide identified using tandem mass spectrometry analysis (MS/MS).

<sup>b</sup> and <sup>b'</sup> Function annotations were retrieved from NCBIInr (<http://www.ncbi.nlm.nih.gov>).

<sup>c</sup> and <sup>d</sup> Information obtained from ProteoIQ program (local license).

**Intracellular proteomic analysis of *Streptomyces* sp. MC1 when exposed to Cr(VI) by gel-based and gel-free methods.** Current Microbiology. José O. Bonilla, Eduardo A. Callegari, María C. Estevez, Liliana B. Villegas.

**Corresponding author:** Liliana B. Villegas. Instituto de Química San Luis (INQUISAL), CONICET. Chacabuco 917, 5700, San Luis, Argentina. T: +54 266 4520300 (6108). e-mail: lbvilleg@hotmail.com, lbvillegas@unsl.edu.ar
