# Supplementary material
Source: PubMed Central journal article supplement (PMC7055499)
Supplement: NIHMS1558170-supplement-Online_Resource_5.pdf [file NIHMS1558170-supplement-Online_Resource_5.pdf]

**Online Resource 5** Proteins identified specifically in intracellular proteins obtained in the presence of Cr(VI) in the culture media.

| <b>Accession<sup>a</sup></b> | <b>Protein identification<sup>a</sup></b>              | <b>Protein Length<sup>b</sup> (AA)</b> | <b>Mass<sup>c</sup> (kDa)</b> |
|------------------------------|--------------------------------------------------------|----------------------------------------|-------------------------------|
| <b>Energy production (1)</b> |                                                        |                                        |                               |
| <b>BAC70593.1</b>            | putative F-type proton-transporting ATPase gamma chain | 305                                    | 32.924                        |
| <b>Biosynthesis (33)</b>     |                                                        |                                        |                               |
| <b>AIJ16970.1</b>            | S-adenosylmethionine synthase                          | 402                                    | 43.415                        |
| <b>AIJ13951.1</b>            | 50S ribosomal protein L3                               | 214                                    | 22.737                        |
| <b>AIJ14567.1</b>            | Phosphoribosylformylglycinamidine synthase 2           | 752                                    | 79.784                        |
| <b>AIJ16924.1</b>            | Pyridoxal biosynthesis lyase PdxS                      | 303                                    | 32.163                        |
| <b>BAC70793.1</b>            | putative ThiF-family protein                           | 392                                    | 42.542                        |
| <b>CBG70776.1</b>            | 30S ribosomal protein S3                               | 277                                    | 30.099                        |
| <b>AIJ13939.1</b>            | 50S ribosomal protein L5                               | 185                                    | 20.822                        |
| <b>AIJ13942.1</b>            | 30S ribosomal protein S17                              | 95                                     | 10.696                        |
| <b>BAC72973.1</b>            | putative AraC-family transcriptional regulator         | 426                                    | 45.423                        |
| <b>BAC72460.1</b>            | putative arginyl-tRNA synthetase                       | 590                                    | 65.130                        |
| <b>AIJ13937.1</b>            | 30S ribosomal protein S8                               | 132                                    | 14.250                        |
| <b>AIJ15517.1</b>            | DNA-binding protein HU (hs1)                           | 93                                     | 9.827                         |
| <b>AIJ14419.1</b>            | RNA polymerase-binding transcription factor CarD       | 160                                    | 17.800                        |
| <b>AIJ13940.1</b>            | 50S ribosomal protein L24                              | 107                                    | 11.565                        |
| <b>AIJ15122.1</b>            | Lsr2-like protein                                      | 111                                    | 11.754                        |
| <b>BAC74533.1</b>            | putative threonyl-tRNA synthetase                      | 658                                    | 74.160                        |
| <b>AIJ15719.1</b>            | Citrate synthase 1                                     | 429                                    | 47.696                        |
| <b>AIJ16945.1</b>            | Alanine-tRNA ligase                                    | 890                                    | 95.709                        |
| <b>CBG72899.1</b>            | citrate synthase                                       | 429                                    | 47.769                        |
| <b>AIJ13099.1</b>            | 50S ribosomal protein L19                              | 116                                    | 13.116                        |
| <b>BAC69955.1</b>            | putative 1-deoxy-D-xylulose 5-phosphate synthase       | 642                                    | 68.666                        |
| <b>AIJ13949.1</b>            | 50S ribosomal protein L23                              | 139                                    | 14.951                        |
| <b>AIJ13996.1</b>            | 50S ribosomal protein L10                              | 176                                    | 18.617                        |
| <b>CBG73723.1</b>            | putative iron-sulphur cluster biosynthesis protein     | 118                                    | 12.420                        |

|                                      |                                                                  |      |         |
|--------------------------------------|------------------------------------------------------------------|------|---------|
| <b>AIJ14816.1</b>                    | Methionine-tRNA ligase                                           | 538  | 59.686  |
| <b>BAC69358.1</b>                    | putative 1-hydroxy-2-methyl-2-(E)-butenyl 4-diphosphate synthase | 385  | 40.771  |
| <b>CBG69989.1</b>                    | 50S ribosomal protein L31                                        | 73   | 8.037   |
| <b>AIJ12991.1</b>                    | 30S ribosomal protein S15                                        | 95   | 10.766  |
| <b>AIJ16963.1</b>                    | Carbamoyl-phosphate synthase large chain                         | 1102 | 117.817 |
| <b>CBG70764.1</b>                    | 50S ribosomal protein L30                                        | 59   | 6.753   |
| <b>AIJ13936.1</b>                    | 50S ribosomal protein L6                                         | 179  | 19.149  |
| <b>AIJ13194.1</b>                    | Aspartyl/glutamyl-tRNA(Asn/Gln) amidotransferase subunit B       | 504  | 54.433  |
| <b>CBG74380.1</b>                    | translation initiation factor IF-3                               | 232  | 25.942  |
| <b>Oxide-reduction processes (8)</b> |                                                                  |      |         |
| <b>AIJ11726.1</b>                    | Ketol-acid reductoisomerase 2                                    | 332  | 36.251  |
| <b>AIJ13181.1</b>                    | Ketol-acid reductoisomerase 1                                    | 332  | 36.213  |
| <b>AIJ13716.1</b>                    | NADP-dependent alcohol dehydrogenase C 1                         | 346  | 36.453  |
| <b>AIJ15377.1</b>                    | oxidoreductase                                                   | 474  | 51.522  |
| <b>AIJ17728.1</b>                    | S-(hydroxymethyl)mycothiol dehydrogenase                         | 362  | 37.936  |
| <b>BAC69838.1</b>                    | putative ferredoxin-nitrite reductase                            | 564  | 62.698  |
| <b>BAC70921.1</b>                    | putative 4-hydroxy-3-methylbut-2-enyl diphosphate reductase      | 338  | 36.551  |
| <b>AIJ12540.1</b>                    | Sulfite reductase [ferredoxin]                                   | 565  | 62.867  |
| <b>Chaperones (1)</b>                |                                                                  |      |         |
| <b>CBG70719.1</b>                    | 10 kD chaperonin cpn10                                           | 102  | 11.021  |
| <b>Other (36)</b>                    |                                                                  |      |         |
| <b>AIJ13143.1</b>                    | 3-isopropylmalate dehydratase large subunit                      | 476  | 50.430  |
| <b>AIJ15778.1</b>                    | putative ABC transporter ATP-binding protein                     | 554  | 61.499  |
| <b>AIJ14955.1</b>                    | Fructose-bisphosphate aldolase                                   | 343  | 36.859  |
| <b>CBG72153.1</b>                    | putative phosphoserine aminotransferase                          | 372  | 39.553  |
| <b>AIJ16370.1</b>                    | Cell division protein FtsZ                                       | 399  | 41.052  |
| <b>AIJ16530.1</b>                    | Vegetative protein                                               | 254  | 27.616  |
| <b>BAC74039.1</b>                    | putative iron-regulated ABC transporter ATP-binding protein      | 260  | 28.267  |
| <b>BAC68872.1</b>                    | putative ion channel subunit                                     | 320  | 35.143  |
| <b>BAC71748.1</b>                    | hypothetical protein SAV_4036                                    | 95   | 9.620   |
| <b>AIJ11559.1</b>                    | two-component system sensory histidine kinase                    | 1331 | 142.051 |
| <b>BAG19738.1</b>                    | conserved hypothetical protein                                   | 162  | 17.928  |

|                   |                                                                 |      |         |
|-------------------|-----------------------------------------------------------------|------|---------|
| <b>AIJ13848.1</b> | Succinyl-CoA ligase [ADP-forming] subunit alpha-1               | 294  | 30.202  |
| <b>AIJ16874.1</b> | Argininosuccinate lyase                                         | 475  | 50.920  |
| <b>AIJ12546.1</b> | lipoprotein                                                     | 367  | 38.415  |
| <b>BAC74201.1</b> | putative hydrolase                                              | 342  | 35.068  |
| <b>AIJ16337.1</b> | Phospho-2-dehydro-3-deoxyheptonate aldolase                     | 448  | 49.621  |
| <b>CBG74079.1</b> | cob(I)yrinic acid a,c-diamide adenosyltransferase (EC 2.5.1.17) | 199  | 22.378  |
| <b>AIJ12753.1</b> | Ornithine carbamoyltransferase                                  | 335  | 36.649  |
| <b>AIJ17905.1</b> | Catalase-peroxidase                                             | 740  | 80.776  |
| <b>CBG74770.1</b> | putative adenylosuccinate lyase                                 | 480  | 51.926  |
| <b>BAC74834.1</b> | putative 6-phosphofructokinase                                  | 341  | 36.385  |
| <b>BAC74125.1</b> | putative magnesium-chelatase subunit                            | 689  | 72.062  |
| <b>BAC73188.1</b> | hypothetical protein SAV_5476                                   | 376  | 41.004  |
| <b>BAC72227.1</b> | hypothetical protein SAV_4515                                   | 175  | 19.949  |
| <b>CBG69102.1</b> | sulfate adenylyltransferase subunit 1                           | 444  | 47.712  |
| <b>BAC73079.1</b> | putative ABC transporter ATP-binding protein                    | 547  | 60.516  |
| <b>AIJ13102.1</b> | hypothetical protein SLIV_10510                                 | 79   | 8.660   |
| <b>BAG18517.1</b> | putative M16-family peptidase                                   | 457  | 49.448  |
| <b>BAG23527.1</b> | putative ABC transporter permease protein                       | 553  | 56.997  |
| <b>AIJ17150.1</b> | hypothetical protein SLIV_31310                                 | 562  | 62.477  |
| <b>BAG19549.1</b> | putative integral membrane protein                              | 608  | 60.155  |
| <b>AIJ14612.1</b> | ATP binding protein                                             | 156  | 17.277  |
| <b>AIJ12950.1</b> | Glutamate transport ATP-binding protein GluA                    | 258  | 28.098  |
| <b>AIJ14744.1</b> | DNA-binding protein                                             | 182  | 19.284  |
| <b>AIJ18085.1</b> | secreted protein                                                | 242  | 25.135  |
| <b>BAC70569.1</b> | putative M protein                                              | 1258 | 138.096 |

<sup>a</sup> and <sup>a'</sup> Function annotations were retrieved from NCBIInr (<http://www.ncbi.nlm.nih.gov>).

<sup>b</sup> and <sup>c</sup> Information obtained from ProteoIQ program (local license)

**Intracellular proteomic analysis of *Streptomyces* sp. MC1 when exposed to Cr(VI) by gel-based and gel-free methods.** Current Microbiology. José O. Bonilla, Eduardo A. Callegari, María C. Estevez, Liliana B. Villegas.  
**Corresponding author:** Liliana B. Villegas. Instituto de Química San Luis (INQUISAL), CONICET. Chacabuco 917, 5700, San Luis, Argentina. T: +54 266 4520300 (6108). e-mail: livilleg@hotmail.com, livillegas@unsl.edu.ar
